# Supplementary material for: Association of Socioeconomic Status With Life's Essential 8 in the National Health and Nutrition Examination Survey: Effect Modification by Sex
Source: PubMed Central journal article supplement — J Am Heart Assoc. 2024 Feb 13;13(4):e030805. doi: 10.1161/JAHA.123.030805 (PMC11010082; doi:10.1161/jaha.123.030805), 2024-02-13

# **SUPPLEMENTAL MATERIAL**

**Table S1. Caloric targets for each age/sex group used to adjust dietary intake values when calculating the Dietary Approaches to Stop**

**Hypertension score.**

| <u>Age</u>       | <u>Males</u>      | <u>Females</u>    |
|------------------|-------------------|-------------------|
| 2-4 years        | 1300 kilocalories | 1200 kilocalories |
| 5-8 years        | 1600 kilocalories | 1500 kilocalories |
| 9-13 years       | 2100 kilocalories | 1800 kilocalories |
| 14-18 years      | 2600 kilocalories | 2100 kilocalories |
| 19-30 years      | 2700 kilocalories | 2100 kilocalories |
| 31-59 years      | 2600 kilocalories | 1900 kilocalories |
| 60 or more years | 2300 kilocalories | 1900 kilocalories |

**Table S2. Association of education level with Life’s Essential 8 scores by race/ethnicity and sex.**

| LE8                        |          |        | Unadjusted Models         |        | Age-Adjusted Models       |       | Multivariable Models      |       |
|----------------------------|----------|--------|---------------------------|--------|---------------------------|-------|---------------------------|-------|
| Variable                   | Group    | Sex    | Beta (CI) p               | Int.p  | Beta (CI) p               | Int.p | Beta (CI) p               | Int.p |
| HS or less vs College+     | Asian    | Female | 8.1 (4.3, 11.9) p<0.001   | 0.604  | 5.9 (2.6, 9.3) p=0.001    | 0.112 | 4.4 (1.0, 7.9) p=0.014    | 0.139 |
| HS or less vs College+     | Asian    | Male   | 9.3 (5.9, 12.7) p<0.001   | 0.604  | 9.5 (6.0, 13.0) p<0.001   | 0.112 | 7.6 (4.2, 11.0) p<0.001   | 0.139 |
| HS or less vs Some College | Asian    | Female | 3.0 (-1.4, 7.4) p=0.174   | 0.975  | 0.9 (-3.1, 4.9) p=0.650   | 0.754 | -0.6 (-4.7, 3.5) p=0.763  | 0.755 |
| HS or less vs Some College | Asian    | Male   | 3.1 (-2.0, 8.2) p=0.224   | 0.975  | 2.0 (-3.4, 7.4) p=0.462   | 0.754 | 0.4 (-4.6, 5.5) p=0.864   | 0.755 |
|                            |          |        |                           |        |                           |       |                           |       |
| HS or less vs College+     | Black    | Female | 11.9 (9.3, 14.4) p<0.001  | 0.005  | 11.5 (9.1, 13.9) p<0.001  | 0.013 | 8.7 (6.4, 11.0) p<0.001   | 0.009 |
| HS or less vs College+     | Black    | Male   | 6.5 (3.4, 9.6) p<0.001    | 0.005  | 6.9 (4.1, 9.8) p<0.001    | 0.013 | 4.3 (1.6, 7.1) p=0.003    | 0.009 |
| HS or less vs Some College | Black    | Female | 5.2 (2.5, 7.9) p<0.001    | 0.604  | 4.2 (2.0, 6.4) p<0.001    | 0.515 | 2.8 (0.7, 4.8) p=0.010    | 0.417 |
| HS or less vs Some College | Black    | Male   | 4.4 (2.1, 6.6) p<0.001    | 0.604  | 3.2 (1.4, 5.0) p=0.001    | 0.515 | 1.5 (-0.4, 3.5) p=0.119   | 0.417 |
|                            |          |        |                           |        |                           |       |                           |       |
| HS or less vs College+     | Hispanic | Female | 10.7 (7.4, 14.0) p<0.001  | 0.569  | 9.8 (7.0, 12.6) p<0.001   | 0.902 | 7.6 (4.5, 10.6) p<0.001   | 0.991 |
| HS or less vs College+     | Hispanic | Male   | 9.6 (6.3, 12.9) p<0.001   | 0.569  | 9.6 (6.5, 12.7) p<0.001   | 0.902 | 7.6 (4.4, 10.8) p<0.001   | 0.991 |
| HS or less vs Some College | Hispanic | Female | 4.7 (2.4, 6.9) p<0.001    | 0.813  | 2.9 (0.8, 5.1) p=0.007    | 0.430 | 1.9 (-0.2, 4.0) p=0.079   | 0.417 |
| HS or less vs Some College | Hispanic | Male   | 5.0 (2.7, 7.4) p<0.001    | 0.813  | 4.1 (1.9, 6.4) p=0.001    | 0.430 | 3.1 (1.0, 5.3) p=0.006    | 0.417 |
|                            |          |        |                           |        |                           |       |                           |       |
| HS or less vs College+     | White    | Female | 18.2 (16.3, 20.0) p<0.001 | <0.001 | 17.1 (15.3, 18.8) p<0.001 | 0.006 | 13.9 (12.1, 15.7) p<0.001 | 0.014 |
| HS or less vs College+     | White    | Male   | 13.4 (11.4, 15.4) p<0.001 | <0.001 | 13.7 (11.7, 15.7) p<0.001 | 0.006 | 10.8 (9.1, 12.5) p<0.001  | 0.014 |
| HS or less vs Some College | White    | Female | 8.2 (6.1, 10.3) p<0.001   | 0.002  | 7.4 (5.4, 9.3) p<0.001    | 0.004 | 5.9 (4.1, 7.7) p<0.001    | 0.006 |
| HS or less vs Some College | White    | Male   | 3.7 (2.0, 5.4) p<0.001    | 0.002  | 3.5 (1.9, 5.1) p<0.001    | 0.004 | 2.3 (0.8, 3.9) p=0.004    | 0.006 |

Beta estimates are the difference between the test level (listed second) and the reference level (listed first). CI – 95% confidence interval, HS – high school, Int.p – interaction p-value. All groups are non-Hispanic except the Hispanic group.

**Table S3. Association of income-to-poverty-line ratio with Life’s Essential 8 scores by race/ethnicity and sex.**

| LE8                 |          |        | Unadjusted Models      |       | Age-Adjusted Models    |       | Multivariable Models    |       |
|---------------------|----------|--------|------------------------|-------|------------------------|-------|-------------------------|-------|
| Variable            | Group    | Sex    | Beta (CI) p            | Int.p | Beta (CI) p            | Int.p | Beta (CI) p             | Int.p |
| Income/Poverty Line | Asian    | Female | 1.5 (0.6, 2.3) p=0.002 | 0.970 | 1.5 (0.7, 2.3) p=0.001 | 0.732 | 0.6 (-0.3, 1.5) p=0.177 | 0.872 |
| Income/Poverty Line | Asian    | Male   | 1.5 (0.8, 2.2) p<0.001 | 0.970 | 1.7 (1.0, 2.3) p<0.001 | 0.732 | 0.5 (-0.2, 1.3) p=0.149 | 0.872 |
| Income/Poverty Line | Black    | Female | 2.1 (1.5, 2.7) p<0.001 | 0.005 | 2.7 (2.1, 3.2) p<0.001 | 0.001 | 1.8 (1.2, 2.5) p<0.001  | 0.002 |
| Income/Poverty Line | Black    | Male   | 0.7 (0.0, 1.4) p=0.047 | 0.005 | 1.2 (0.6, 1.9) p<0.001 | 0.001 | 0.5 (-0.2, 1.2) p=0.178 | 0.002 |
| Income/Poverty Line | Hispanic | Female | 1.5 (0.9, 2.2) p<0.001 | 0.851 | 1.7 (1.1, 2.4) p<0.001 | 0.925 | 0.6 (-0.2, 1.4) p=0.115 | 0.986 |
| Income/Poverty Line | Hispanic | Male   | 1.5 (0.8, 2.1) p<0.001 | 0.851 | 1.7 (1.0, 2.4) p<0.001 | 0.925 | 0.6 (-0.1, 1.4) p=0.109 | 0.986 |
| Income/Poverty Line | White    | Female | 3.2 (2.7, 3.7) p<0.001 | 0.002 | 3.4 (3.0, 3.9) p<0.001 | 0.002 | 1.6 (1.1, 2.1) p<0.001  | 0.001 |
| Income/Poverty Line | White    | Male   | 2.2 (1.5, 2.9) p<0.001 | 0.002 | 2.5 (1.8, 3.1) p<0.001 | 0.002 | 0.7 (0.1, 1.2) p=0.023  | 0.001 |

Beta estimates are the difference between the test level (listed second) and the reference level (listed first). CI – 95% confidence interval, Int.p – interaction p-value. All groups are non-Hispanic except the Hispanic group.

**Table S4. Association of health insurance status with Life’s Essential 8 scores by race/ethnicity and sex.**

| LE8                    |          |        | Unadjusted Models              |       | Age-Adjusted Models        |       | Multivariable Models      |       |
|------------------------|----------|--------|--------------------------------|-------|----------------------------|-------|---------------------------|-------|
| Variable               | Group    | Sex    | Beta (CI) p                    | Int.p | Beta (CI) p                | Int.p | Beta (CI) p               | Int.p |
| Private vs Combination | Asian    | Female | -7.7 (-13.8, -1.5)<br>p=0.016  | 0.261 | 1.0 (-5.1, 7.1) p=0.752    | 0.344 | 0.7 (-5.1, 6.4) p=0.816   | 0.333 |
| Private vs Combination | Asian    | Male   | -3.4 (-8.9, 2.1) p=0.219       | 0.261 | 4.6 (-1.4, 10.5) p=0.127   | 0.344 | 4.1 (-1.9, 10.1) p=0.174  | 0.333 |
| Private vs Medicaid    | Asian    | Female | -7.6 (-14.7, -0.5)<br>p=0.037  | 0.208 | -6.7 (-13.2, -0.3) p=0.042 | 0.338 | -2.9 (-9.6, 3.8) p=0.379  | 0.143 |
| Private vs Medicaid    | Asian    | Male   | -2.3 (-9.3, 4.8) p=0.520       | 0.208 | -3.1 (-9.2, 3.1) p=0.317   | 0.338 | 2.1 (-4.2, 8.4) p=0.503   | 0.143 |
| Private vs Medicare    | Asian    | Female | -11.0 (-14.6, -7.4)<br>p<0.001 | 0.009 | -2.0 (-6.1, 2.0) p=0.320   | 0.005 | -2.4 (-6.4, 1.7) p=0.250  | 0.001 |
| Private vs Medicare    | Asian    | Male   | -4.0 (-8.0, -0.1) p=0.045      | 0.009 | 5.7 (1.3, 10.2) p=0.013    | 0.005 | 6.5 (2.2, 10.7) p=0.004   | 0.001 |
| Private vs Military    | Asian    | Female | -3.8 (-7.5, -0.1) p=0.045      | 0.009 | -0.8 (-4.7, 3.1) p=0.683   | 0.012 | 2.5 (-1.8, 6.7) p=0.253   | 0.086 |
| Private vs Military    | Asian    | Male   | 13.9 (1.6, 26.2) p=0.028       | 0.009 | 11.3 (2.7, 19.9) p=0.011   | 0.012 | 13.6 (1.4, 25.9) p=0.030  | 0.086 |
| Private vs Other       | Asian    | Female | -2.2 (-7.2, 2.8) p=0.379       | 0.545 | -0.6 (-5.1, 4.0) p=0.801   | 0.390 | 0.7 (-4.0, 5.5) p=0.758   | 0.452 |
| Private vs Other       | Asian    | Male   | -3.8 (-7.3, -0.3) p=0.034      | 0.545 | -3.0 (-7.8, 1.8) p=0.217   | 0.390 | -1.2 (-5.4, 3.0) p=0.563  | 0.452 |
| Private vs Uninsured   | Asian    | Female | -3.5 (-7.9, 0.9) p=0.115       | 0.063 | -4.7 (-8.5, -0.9) p=0.016  | 0.115 | -2.3 (-6.0, 1.3) p=0.198  | 0.183 |
| Private vs Uninsured   | Asian    | Male   | -8.3 (-12.5, -4.2)<br>p<0.001  | 0.063 | -8.8 (-13.1, -4.5) p<0.001 | 0.115 | -5.4 (-9.4, -1.4) p=0.010 | 0.183 |
| Private vs Combination | Black    | Female | -8.6 (-11.3, -5.9)<br>p<0.001  | 0.076 | -1.3 (-4.6, 2.0) p=0.430   | 0.011 | 1.2 (-1.9, 4.3) p=0.436   | 0.048 |
| Private vs Combination | Black    | Male   | -5.5 (-8.0, -2.9) p<0.001      | 0.076 | 3.3 (0.8, 5.9) p=0.012     | 0.011 | 4.6 (2.0, 7.3) p=0.001    | 0.048 |
| Private vs Medicaid    | Black    | Female | -5.2 (-8.4, -2.0) p=0.002      | 0.466 | -8.3 (-11.6, -5.0) p<0.001 | 0.149 | -3.3 (-6.4, -0.2) p=0.037 | 0.079 |
| Private vs Medicaid    | Black    | Male   | -3.0 (-7.3, 1.4) p=0.182       | 0.466 | -4.2 (-8.2, -0.2) p=0.042  | 0.149 | 1.6 (-2.8, 5.9) p=0.478   | 0.079 |
| Private vs Medicare    | Black    | Female | -6.5 (-9.6, -3.5) p<0.001      | 0.835 | 1.8 (-1.5, 5.1) p=0.272    | 0.769 | 4.2 (0.9, 7.6) p=0.015    | 0.638 |
| Private vs Medicare    | Black    | Male   | -6.0 (-9.6, -2.4) p=0.002      | 0.835 | 2.5 (-0.4, 5.4) p=0.093    | 0.769 | 5.3 (2.5, 8.2) p=0.001    | 0.638 |
| Private vs Military    | Black    | Female | -0.7 (-7.5, 6.2) p=0.842       | 0.109 | 0.3 (-6.0, 6.5) p=0.934    | 0.346 | -0.5 (-6.9, 6.0) p=0.883  | 0.637 |
| Private vs Military    | Black    | Male   | -7.8 (-14.7, -1.0)<br>p=0.025  | 0.109 | -4.0 (-10.8, 2.9) p=0.249  | 0.346 | -2.6 (-9.7, 4.4) p=0.453  | 0.637 |
| Private vs Other       | Black    | Female | -1.7 (-4.7, 1.2) p=0.238       | 0.240 | -2.2 (-5.0, 0.7) p=0.132   | 0.138 | 1.1 (-1.8, 3.9) p=0.462   | 0.206 |
| Private vs Other       | Black    | Male   | 1.2 (-2.8, 5.1) p=0.551        | 0.240 | 1.6 (-2.5, 5.7) p=0.426    | 0.138 | 4.1 (0.3, 8.0) p=0.037    | 0.206 |
| Private vs Uninsured   | Black    | Female | -2.1 (-4.5, 0.3) p=0.086       | 0.632 | -4.1 (-6.3, -1.9) p<0.001  | 0.806 | -0.8 (-3.0, 1.4) p=0.458  | 0.812 |
| Private vs Uninsured   | Black    | Male   | -1.5 (-4.1, 1.1) p=0.250       | 0.632 | -3.8 (-6.2, -1.4) p=0.003  | 0.806 | -0.5 (-3.0, 2.0) p=0.676  | 0.812 |
| Private vs Combination | Hispanic | Female | -10.5 (-13.6, -7.4)<br>p<0.001 | 0.585 | -1.7 (-4.7, 1.3) p=0.265   | 0.750 | 2.0 (-1.6, 5.6) p=0.271   | 0.964 |
| Private vs Combination | Hispanic | Male   | -8.8 (-14.1, -3.6)<br>p=0.001  | 0.585 | -0.6 (-7.3, 6.1) p=0.859   | 0.750 | 1.8 (-5.4, 9.0) p=0.612   | 0.964 |
| Private vs Medicaid    | Hispanic | Female | -6.8 (-9.6, -4.1) p<0.001      | 0.191 | -7.2 (-9.6, -4.8) p<0.001  | 0.055 | -2.6 (-5.6, 0.3) p=0.079  | 0.061 |
| Private vs Medicaid    | Hispanic | Male   | -3.9 (-7.8, -0.1) p=0.045      | 0.191 | -3.2 (-6.7, 0.3) p=0.076   | 0.055 | 1.2 (-2.8, 5.2) p=0.548   | 0.061 |
| Private vs Medicare    | Hispanic | Female | -12.0 (-15.7, -8.4)<br>p<0.001 | 0.108 | -3.0 (-6.6, 0.6) p=0.105   | 0.221 | 0.2 (-3.7, 4.2) p=0.910   | 0.096 |
| Private vs Medicare    | Hispanic | Male   | -7.9 (-11.5, -4.4)<br>p<0.001  | 0.108 | 0.1 (-3.4, 3.6) p=0.950    | 0.221 | 4.4 (0.0, 8.7) p=0.048    | 0.096 |
| Private vs Military    | Hispanic | Female | -4.6 (-11.9, 2.6) p=0.202      | 0.006 | -3.5 (-13.1, 6.0) p=0.459  | 0.060 | -1.2 (-10.3, 8.0) p=0.799 | 0.033 |

|                        |          |        |                                 |        |                                 |        |                             |       |
|------------------------|----------|--------|---------------------------------|--------|---------------------------------|--------|-----------------------------|-------|
| Private vs Military    | Hispanic | Male   | -16.3 (-20.7, -11.8)<br>p<0.001 | 0.006  | -13.7 (-19.3, -8.2) p<0.001     | 0.060  | -11.3 (-15.9, -6.6) p<0.001 | 0.033 |
| Private vs Other       | Hispanic | Female | 0.5 (-2.9, 3.9) p=0.767         | 0.478  | 0.7 (-2.6, 4.0) p=0.676         | 0.804  | 2.2 (-0.9, 5.4) p=0.160     | 0.635 |
| Private vs Other       | Hispanic | Male   | -1.4 (-5.4, 2.5) p=0.469        | 0.478  | 0.1 (-3.4, 3.5) p=0.973         | 0.804  | 1.1 (-2.6, 4.7) p=0.557     | 0.635 |
| Private vs Uninsured   | Hispanic | Female | -3.6 (-6.1, -1.2) p=0.004       | 0.773  | -4.5 (-6.8, -2.1) p<0.001       | 0.657  | -1.2 (-3.7, 1.3) p=0.334    | 0.514 |
| Private vs Uninsured   | Hispanic | Male   | -4.1 (-7.3, -1.0) p=0.010       | 0.773  | -5.3 (-8.4, -2.1) p=0.001       | 0.657  | -2.3 (-5.4, 0.8) p=0.139    | 0.514 |
| Private vs Combination | White    | Female | -9.5 (-11.4, -7.6)<br>p<0.001   | <0.001 | -3.0 (-5.2, -0.8) p=0.007       | <0.001 | 1.3 (-0.6, 3.1) p=0.166     | 0.001 |
| Private vs Combination | White    | Male   | -2.8 (-4.8, -0.8) p=0.007       | <0.001 | 3.6 (1.0, 6.2) p=0.008          | <0.001 | 5.5 (3.3, 7.6) p<0.001      | 0.001 |
| Private vs Medicaid    | White    | Female | -14.5 (-17.4, -11.5)<br>p<0.001 | 0.151  | -16.1 (-18.8, -13.5)<br>p<0.001 | 0.069  | -6.6 (-8.9, -4.4) p<0.001   | 0.022 |
| Private vs Medicaid    | White    | Male   | -8.3 (-16.2, -0.5)<br>p=0.038   | 0.151  | -9.1 (-16.1, -2.1) p=0.011      | 0.069  | 1.4 (-4.6, 7.5) p=0.637     | 0.022 |
| Private vs Medicare    | White    | Female | -10.1 (-12.7, -7.4)<br>p<0.001  | 0.368  | -3.8 (-6.9, -0.6) p=0.019       | 0.419  | 1.7 (-1.0, 4.4) p=0.215     | 0.759 |
| Private vs Medicare    | White    | Male   | -8.3 (-11.1, -5.6)<br>p<0.001   | 0.368  | -2.1 (-5.6, 1.3) p=0.218        | 0.419  | 2.3 (-0.9, 5.5) p=0.159     | 0.759 |
| Private vs Military    | White    | Female | -2.8 (-10.4, 4.7) p=0.457       | 0.372  | -2.3 (-10.0, 5.4) p=0.552       | 0.410  | 0.7 (-4.6, 6.0) p=0.794     | 0.722 |
| Private vs Military    | White    | Male   | -6.7 (-11.3, -2.1)<br>p=0.005   | 0.372  | -5.9 (-9.9, -1.9) p=0.005       | 0.410  | -0.5 (-3.9, 2.8) p=0.753    | 0.722 |
| Private vs Other       | White    | Female | -5.9 (-10.2, -1.6)<br>p=0.008   | 0.893  | -6.5 (-10.6, -2.3) p=0.003      | 0.995  | -2.4 (-6.3, 1.6) p=0.238    | 0.829 |
| Private vs Other       | White    | Male   | -6.3 (-9.7, -2.8) p=0.001       | 0.893  | -6.5 (-10.0, -2.9) p=0.001      | 0.995  | -2.9 (-6.0, 0.2) p=0.064    | 0.829 |
| Private vs Uninsured   | White    | Female | -9.2 (-11.9, -6.4)<br>p<0.001   | 0.093  | -10.2 (-12.9, -7.5) p<0.001     | 0.044  | -3.9 (-6.1, -1.7) p=0.001   | 0.110 |
| Private vs Uninsured   | White    | Male   | -6.0 (-9.1, -3.0) p<0.001       | 0.093  | -6.7 (-9.4, -3.9) p<0.001       | 0.044  | -1.3 (-3.9, 1.3) p=0.320    | 0.110 |

Beta estimates are the difference between the test level (listed second) and the reference level (listed first). CI – 95% confidence interval, Int.p – interaction p-value. All groups are non-Hispanic except the Hispanic group.

**Table S5. Association of employment status with Life's Essential 8 scores by race/ethnicity and sex.**

| LE8                    |          |        | Unadjusted Models           |        | Age-Adjusted Models         |        | Multivariable Models        |        |
|------------------------|----------|--------|-----------------------------|--------|-----------------------------|--------|-----------------------------|--------|
| Variable               | Group    | Sex    | Beta (CI) p                 | Int.p  | Beta (CI) p                 | Int.p  | Beta (CI) p                 | Int.p  |
| Employed vs Disability | Asian    | Female | -7.8 (-16.9, 1.3) p=0.092   | 0.212  | -5.6 (-14.7, 3.6) p=0.227   | 0.636  | -6.1 (-13.4, 1.3) p=0.104   | 0.783  |
| Employed vs Disability | Asian    | Male   | -14.7 (-21.0, -8.4) p<0.001 | 0.212  | -8.1 (-14.1, -2.1) p=0.009  | 0.636  | -4.9 (-10.1, 0.3) p=0.065   | 0.783  |
| Employed vs Homemaker  | Asian    | Female | -1.3 (-4.9, 2.4) p=0.492    | 0.001  | -0.3 (-3.6, 2.9) p=0.842    | 0.001  | -0.4 (-3.7, 2.8) p=0.790    | 0.003  |
| Employed vs Homemaker  | Asian    | Male   | -14.1 (-21.3, -6.9) p<0.001 | 0.001  | -14.7 (-21.9, -7.4) p<0.001 | 0.001  | -12.9 (-19.9, -5.9) p=0.001 | 0.003  |
| Employed vs Retired    | Asian    | Female | -9.1 (-12.9, -5.3) p<0.001  | <0.001 | -0.7 (-4.6, 3.2) p=0.715    | <0.001 | -0.7 (-4.8, 3.4) p=0.739    | <0.001 |
| Employed vs Retired    | Asian    | Male   | 0.2 (-3.0, 3.5) p=0.883     | <0.001 | 8.6 (5.5, 11.7) p<0.001     | <0.001 | 8.5 (5.4, 11.7) p<0.001     | <0.001 |
| Employed vs Student    | Asian    | Female | 7.3 (0.7, 14.0) p=0.032     | 0.979  | 3.3 (-3.3, 10.0) p=0.317    | 0.668  | 5.4 (-0.9, 11.7) p=0.088    | 0.578  |
| Employed vs Student    | Asian    | Male   | 7.2 (2.2, 12.3) p=0.006     | 0.979  | 1.7 (-3.7, 7.2) p=0.521     | 0.668  | 3.3 (-2.2, 8.7) p=0.231     | 0.578  |
| Employed vs Unemployed | Asian    | Female | 0.9 (-3.9, 5.6) p=0.714     | 0.177  | -0.7 (-5.5, 4.1) p=0.778    | 0.301  | 0.4 (-4.6, 5.3) p=0.880     | 0.246  |
| Employed vs Unemployed | Asian    | Male   | -6.9 (-16.5, 2.7) p=0.153   | 0.177  | -6.9 (-16.8, 3.1) p=0.174   | 0.301  | -5.6 (-13.6, 2.5) p=0.171   | 0.246  |
| Employed vs Disability | Black    | Female | -11.9 (-15.4, -8.5) p<0.001 | 0.349  | -8.4 (-11.9, -4.9) p<0.001  | 0.333  | -5.6 (-8.9, -2.3) p=0.001   | 0.214  |
| Employed vs Disability | Black    | Male   | -9.3 (-13.1, -5.6) p<0.001  | 0.349  | -5.8 (-9.5, -2.1) p=0.003   | 0.333  | -2.3 (-6.4, 1.8) p=0.264    | 0.214  |
| Employed vs Homemaker  | Black    | Female | -5.0 (-9.9, 0.0) p=0.050    | 0.238  | -6.6 (-11.6, -1.7) p=0.009  | 0.237  | -2.8 (-7.3, 1.8) p=0.222    | 0.180  |
| Employed vs Homemaker  | Black    | Male   | 1.1 (-8.1, 10.4) p=0.806    | 0.238  | -0.2 (-10.3, 9.8) p=0.961   | 0.237  | 4.4 (-5.8, 14.7) p=0.383    | 0.180  |
| Employed vs Retired    | Black    | Female | -5.8 (-8.0, -3.7) p<0.001   | 0.617  | 3.2 (1.0, 5.5) p=0.006      | 0.557  | 3.7 (1.2, 6.2) p=0.005      | 0.363  |
| Employed vs Retired    | Black    | Male   | -4.9 (-8.1, -1.7) p=0.003   | 0.617  | 4.4 (0.5, 8.3) p=0.029      | 0.557  | 5.4 (1.3, 9.4) p=0.010      | 0.363  |
| Employed vs Student    | Black    | Female | 9.2 (2.9, 15.4) p=0.005     | 0.550  | 5.1 (0.0, 10.1) p=0.049     | 0.754  | 6.5 (1.3, 11.6) p=0.015     | 0.912  |
| Employed vs Student    | Black    | Male   | 11.1 (4.8, 17.3) p=0.001    | 0.550  | 6.0 (0.3, 11.7) p=0.040     | 0.754  | 6.8 (1.0, 12.5) p=0.022     | 0.912  |
| Employed vs Unemployed | Black    | Female | -1.9 (-5.8, 2.0) p=0.333    | 0.211  | -2.2 (-5.9, 1.6) p=0.252    | 0.376  | 0.1 (-3.3, 3.5) p=0.957     | 0.339  |
| Employed vs Unemployed | Black    | Male   | 1.5 (-2.0, 5.1) p=0.387     | 0.211  | 0.2 (-3.0, 3.3) p=0.914     | 0.376  | 2.4 (-0.6, 5.5) p=0.117     | 0.339  |
| Employed vs Disability | Hispanic | Female | -12.4 (-15.3, -9.4) p<0.001 | 0.617  | -8.4 (-11.5, -5.4) p<0.001  | 0.562  | -6.6 (-9.8, -3.5) p<0.001   | 0.752  |
| Employed vs Disability | Hispanic | Male   | -11.2 (-15.3, -7.0) p<0.001 | 0.617  | -7.0 (-11.3, -2.6) p=0.002  | 0.562  | -5.8 (-10.4, -1.2) p=0.016  | 0.752  |
| Employed vs Homemaker  | Hispanic | Female | -2.1 (-4.6, 0.4) p=0.092    | 0.004  | -1.1 (-3.4, 1.2) p=0.327    | 0.020  | 0.9 (-1.5, 3.4) p=0.435     | 0.027  |
| Employed vs Homemaker  | Hispanic | Male   | -12.4 (-18.4, -6.4) p<0.001 | 0.004  | -7.6 (-12.2, -3.0) p=0.002  | 0.020  | -7.5 (-14.8, -0.1) p=0.047  | 0.027  |
| Employed vs Retired    | Hispanic | Female | -8.2 (-10.7, -5.7) p<0.001  | 0.163  | 0.2 (-2.4, 2.9) p=0.857     | 0.103  | 0.2 (-3.2, 3.7) p=0.899     | 0.125  |

|                        |          |        |                              |        |                              |        |                             |       |
|------------------------|----------|--------|------------------------------|--------|------------------------------|--------|-----------------------------|-------|
| Employed vs Retired    | Hispanic | Male   | -5.6 (-8.6, -2.6) p=0.001    | 0.163  | 3.3 (0.1, 6.4) p=0.042       | 0.103  | 3.1 (-0.5, 6.8) p=0.091     | 0.125 |
| Employed vs Student    | Hispanic | Female | 5.4 (-0.3, 11.1) p=0.062     | 0.965  | 1.5 (-4.2, 7.2) p=0.603      | 0.993  | 1.7 (-3.5, 6.9) p=0.508     | 0.831 |
| Employed vs Student    | Hispanic | Male   | 5.6 (-3.3, 14.5) p=0.211     | 0.965  | 1.4 (-6.8, 9.7) p=0.728      | 0.993  | 0.8 (-7.3, 8.9) p=0.846     | 0.831 |
| Employed vs Unemployed | Hispanic | Female | -4.7 (-8.0, -1.5) p=0.005    | 0.584  | -4.1 (-7.3, -1.0) p=0.011    | 0.995  | -2.6 (-5.6, 0.5) p=0.094    | 0.992 |
| Employed vs Unemployed | Hispanic | Male   | -3.3 (-7.4, 0.8) p=0.111     | 0.584  | -4.1 (-8.1, -0.1) p=0.043    | 0.995  | -2.6 (-6.6, 1.5) p=0.211    | 0.992 |
| Employed vs Disability | White    | Female | -19.7 (-22.9, -16.4) p<0.001 | 0.022  | -18.0 (-21.3, -14.7) p<0.001 | 0.015  | -11.2 (-14.5, -7.9) p<0.001 | 0.043 |
| Employed vs Disability | White    | Male   | -15.2 (-18.2, -12.2) p<0.001 | 0.022  | -13.3 (-16.4, -10.2) p<0.001 | 0.015  | -7.5 (-10.8, -4.2) p<0.001  | 0.043 |
| Employed vs Homemaker  | White    | Female | -0.0 (-3.6, 3.6) p=0.996     | 0.002  | -0.6 (-4.0, 2.9) p=0.737     | 0.004  | 1.3 (-1.3, 3.9) p=0.320     | 0.005 |
| Employed vs Homemaker  | White    | Male   | -13.2 (-18.8, -7.6) p<0.001  | 0.002  | -12.0 (-17.2, -6.7) p<0.001  | 0.004  | -8.6 (-14.3, -3.0) p=0.003  | 0.005 |
| Employed vs Retired    | White    | Female | -7.5 (-9.4, -5.5) p<0.001    | <0.001 | -2.1 (-4.4, 0.2) p=0.078     | <0.001 | 0.2 (-2.0, 2.3) p=0.882     | 0.009 |
| Employed vs Retired    | White    | Male   | -2.5 (-4.2, -0.9) p=0.003    | <0.001 | 2.9 (0.6, 5.3) p=0.016       | <0.001 | 2.9 (0.9, 4.9) p=0.005      | 0.009 |
| Employed vs Student    | White    | Female | 10.2 (3.8, 16.7) p=0.002     | 0.463  | 6.3 (0.4, 12.2) p=0.036      | 0.568  | 8.4 (1.4, 15.4) p=0.020     | 0.566 |
| Employed vs Student    | White    | Male   | 7.5 (1.8, 13.2) p=0.011      | 0.463  | 4.3 (-1.2, 9.8) p=0.124      | 0.568  | 6.1 (0.7, 11.5) p=0.027     | 0.566 |
| Employed vs Unemployed | White    | Female | -2.7 (-6.1, 0.6) p=0.103     | 0.258  | -2.3 (-5.7, 1.2) p=0.192     | 0.526  | 0.3 (-3.0, 3.6) p=0.865     | 0.500 |
| Employed vs Unemployed | White    | Male   | -0.0 (-2.9, 2.9) p=0.995     | 0.258  | -0.6 (-3.8, 2.5) p=0.684     | 0.526  | 1.7 (-0.9, 4.3) p=0.199     | 0.500 |

Beta estimates are the difference between the test level (listed second) and the reference level (listed first). CI – 95% confidence interval, Int.p – interaction p-value. All groups are non-Hispanic except the Hispanic group.



**Figure S1. Exclusion Cascade.**

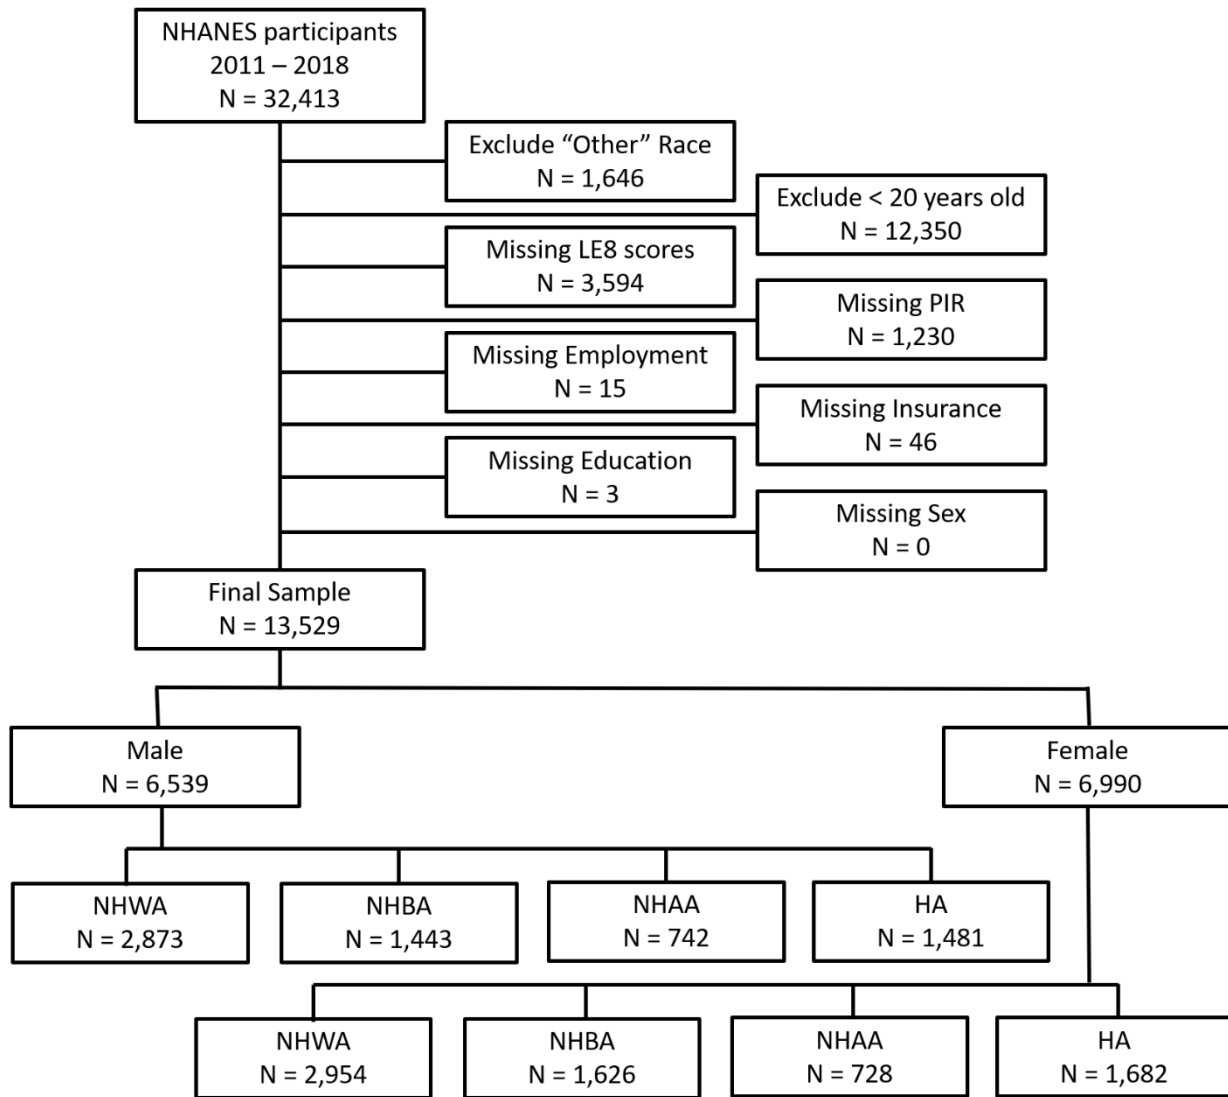

HA – Hispanic American, LE8 – Life’s Essential 8, NHAA – non-Hispanic Asian American, NHANES – National Health and Nutrition Examination Survey, NHBA – non-Hispanic Black American, NHWA – non-Hispanic White American, PIR – income-to-poverty-line ratio

Figure S2. Conceptual model: does sex modify the association of socioeconomic status with Life's Essential 8?

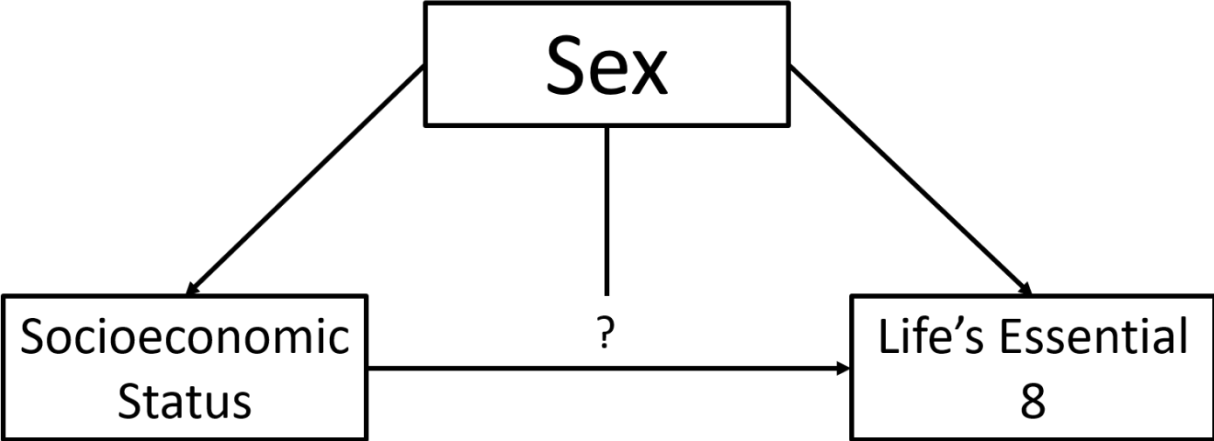

Supplement: JAH3-13-e030805-s001.pdf [file JAH3-13-e030805-s001.pdf]
